# Supplementary material for: Suppression of R5-type of HIV-1 in CD4+ NKT cells by Vδ1+ T cells activated by flavonoid glycosides, hesperidin and linarin
Source: PubMed Central journal article supplement (PMC6525194; doi:10.1038/s41598-019-40587-6), 2019-05-17
Supplement: 41598_2019_40587_MOESM1_ESM.pdf [file 41598_2019_40587_MOESM1_ESM.pdf]

**Suppression of R5-type of HIV-1 in CD4<sup>+</sup> NKT cells by V $\delta$ 1<sup>+</sup> T cells activated by flavonoid glycosides, hesperidin and linarin**

Michiyuki Yonekawa, Masumi Shimizu, Atsushi Kaneko, Jiro Matsumura, and Hidemi Takahashi

**Supplementary Figures**

## y1 TCR gene insert

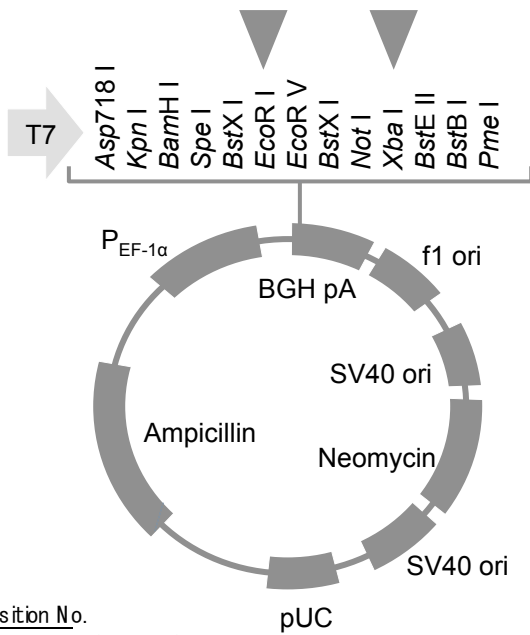

## pEF1/Myc-His A plasmid

The sequence for pEF1/Myc-His A (Thermo Fisher Scientific, Cat. No.: V921-20) is available for downloading from [www.invitrogen.com](http://www.invitrogen.com).

### Composition:

L - Vy1.4 - N - Jy2.3 - Cy2

Boxed sequence: Restriction enzyme site

Gray area: Vy1.4 region (TCR GV1S4)

Dash line: -N- region

Solid line: Jy2.3 region (TCR GJ2S2)

Position No.

| P.  | N.  | (EcoR I)                                                                        |     |     |     |     |     |     |     |     |     |         |     |     |     |     |     |     |   |   |   |   |   |   |   |   |   |   |   |   |   |   |   |   |
|-----|-----|---------------------------------------------------------------------------------|-----|-----|-----|-----|-----|-----|-----|-----|-----|---------|-----|-----|-----|-----|-----|-----|---|---|---|---|---|---|---|---|---|---|---|---|---|---|---|---|
| 1   | 1   | GAATTCGGAAGGC                                                                   | ATG | CGG | TGG | GCC | CTA | GCG | GTG | CTT | CTA | GCT     | TTC | CTG | TCT | CCT | GCC | AGT | M | R | W | A | L | A | V | L | L | A | F | L | S | P | A | S |
| 62  | 17  | CAG AAA TCT TCC AAC TTG GAA GGG AGA ACG AAG TCA GTC ATC AGG CAG ACT GGG TCA TCT | Q   | K   | S   | S   | N   | L   | E   | G   | R   | T       | K   | S   | V   | I   | R   | Q   | T | G | S | S |   |   |   |   |   |   |   |   |   |   |   |   |
| 122 | 37  | GCT GAA ATC ACT TGT GAT CTT GCT GAA GGA AGT ACC GGC TAC ATC CAC TGG TAC CTA CAC | A   | E   | I   | T   | C   | D   | L   | A   | E   | G       | S   | T   | G   | Y   | I   | H   | W | Y | L | H |   |   |   |   |   |   |   |   |   |   |   |   |
| 182 | 57  | CAG GAG GGG AAG GCC CCA CAG CGT CTT CTG TAG TAT GAC TCC TAC ACC TCC AGC GTT GTG | Q   | E   | G   | K   | A   | P   | Q   | R   | L   | L       | Y   | Y   | D   | S   | Y   | T   | S | S | V | V |   |   |   |   |   |   |   |   |   |   |   |   |
| 242 | 77  | TTG GAA TCA GGA ATC AGC CCA GGG AAG TAT GAT ACT TAT GGA AGC ACA AGG AAG AAC TTG | L   | E   | S   | G   | I   | S   | P   | G   | K   | Y       | D   | T   | Y   | G   | S   | T   | R | K | N | L |   |   |   |   |   |   |   |   |   |   |   |   |
| 302 | 97  | AGA ATG ATA CTG CGA AAT CTT ATT GAA AAT GAC TCT GGA GTC TAT TAC TGT GCC ACC TGG | R   | M   | I   | L   | R   | N   | L   | I   | E   | N       | D   | S   | G   | V   | Y   | Y   | C | A | T | W |   |   |   |   |   |   |   |   |   |   |   |   |
| 362 | 117 | GAT GGA GAT CTT TAT TAT AAG AAA CTC TTT GGC AGT GGA ACA ACA CTT GTT GTC ACA GAT | D   | G   | D   | L   | Y   | Y   | K   | K   | L   | F       | G   | S   | G   | T   | T   | L   | V | V | T | D |   |   |   |   |   |   |   |   |   |   |   |   |
| 422 | 137 | AAA CAA CTT GAT GCA GAT GTT TCC CCC AAG CCC ACT ATT TTT CTT CCT TCG ATT GCT GAA | K   | Q   | L   | D   | A   | D   | V   | S   | P   | K       | P   | T   | I   | F   | L   | P   | S | I | A | E |   |   |   |   |   |   |   |   |   |   |   |   |
| 482 | 157 | ACA AAA CTC CAG AAG GCT GGA ACA TAG CTT TGT CTT CTT GAG AAA TTT TTC CCA GAT ATT | T   | K   | L   | Q   | K   | A   | G   | T   | Y   | L       | C   | L   | L   | E   | K   | F   | F | P | D | I |   |   |   |   |   |   |   |   |   |   |   |   |
| 542 | 177 | ATT AAG ATA CAT TGG CAA GAA AAG AAG AGC AAC ACG ATT CTG GGA TCC CAG GAG GGG AAC | I   | K   | I   | H   | W   | Q   | E   | K   | K   | S       | N   | T   | I   | L   | G   | S   | Q | E | G | N |   |   |   |   |   |   |   |   |   |   |   |   |
| 602 | 197 | ACC ATG AAG ACT AAC GAC ACA TAC ATG AAA TTT AGC TGG TTA ACG GTG CCA GAA GAG TCA | T   | M   | K   | T   | N   | D   | T   | Y   | M   | K       | F   | S   | W   | L   | T   | V   | P | E | E | S |   |   |   |   |   |   |   |   |   |   |   |   |
| 662 | 217 | CTG GAC AAA GAA CAC AGA TGT ATC GTC AGA CAT GAG AAT AAT AAA AAC GGA ATT GAT CAA | L   | D   | K   | E   | H   | R   | C   | I   | V   | R       | H   | E   | N   | N   | K   | N   | G | I | D | Q |   |   |   |   |   |   |   |   |   |   |   |   |
| 722 | 237 | GAA ATT ATC TTT CCT CCA ATA AAG ACA GAT GTC ACC ACA GTG GAT CCC AAA TAC AAT TAT | E   | I   | I   | F   | P   | P   | I   | K   | T   | D       | V   | T   | T   | V   | D   | P   | K | Y | N | Y |   |   |   |   |   |   |   |   |   |   |   |   |
| 782 | 257 | TCA AAG GAT GCA AAT GAT GTC ATC ACA ATG GAT CCC AAA GAC AAT TGG TCA AAA GAT GCA | S   | K   | D   | A   | N   | D   | V   | I   | T   | M       | D   | P   | K   | D   | N   | W   | S | K | D | A |   |   |   |   |   |   |   |   |   |   |   |   |
| 842 | 277 | AAT GAT ACA CTA CTG CTG CAG CTC ACA AAC ACC TCT GCA TAT TAC ATG TAC CTC CTC CTG | N   | D   | T   | L   | L   | L   | Q   | L   | T   | N       | T   | S   | A   | Y   | Y   | M   | Y | L | L | L |   |   |   |   |   |   |   |   |   |   |   |   |
| 902 | 297 | CTC CTC AAG AGT GTG GTC TAT TTT GCC ATC ATC ACC TGC TGT CTG CTT GGA AGA ACG GCT | L   | L   | K   | S   | V   | V   | Y   | F   | A   | I       | I   | T   | C   | C   | L   | L   | G | R | T | A |   |   |   |   |   |   |   |   |   |   |   |   |
| 962 | 317 | TTC TGC TGC AAT GGA GAG AAA TCA TAA CAG TCTAGA                                  | F   | C   | C   | N   | G   | E   | K   | S   | .   | (Xba I) |     |     |     |     |     |     |   |   |   |   |   |   |   |   |   |   |   |   |   |   |   |   |

## Supplementary Figure S1A.

Nucleotide and deduced amino acid sequences of y1 TCR gene in y1/pEF1 plasmid.

## δ1 TCR gene insert

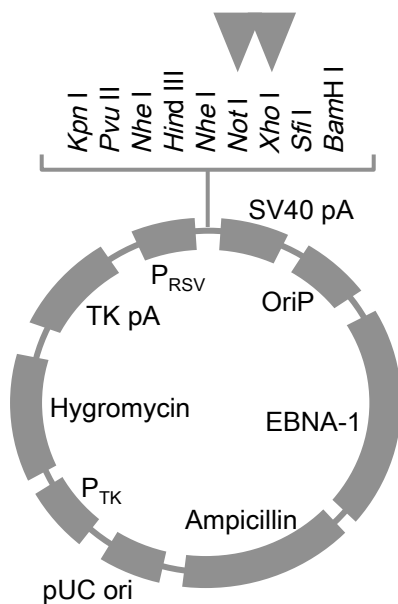

## pREP4 plasmid

The sequence for pREP4 (Thermo Fisher Scientific, Cat. No.: V004-50) is available for downloading from [www.invitrogen.com](http://www.invitrogen.com).

### Composition:

L - Vδ1 - NDN - Jδ1 - Cδ1

Boxed sequence: Restriction enzyme site

Gray area: Vδ1 region (TCRDV101S1)

Dash line: -NDN- region

Solid line: Jδ1 region (TCRDJ1S1)

Position No.

| P.  | N. (Not I) |                                                                                        |
|-----|------------|----------------------------------------------------------------------------------------|
| 1   | 1          | <b>GCGGCCGC</b> CTTCAGGCAGCACAACTCACATTTGTGCAAAAGAGCTACATGCCAC ATG CTG TTC TCC AGC CTG |
| 1   |            | M L F S S L                                                                            |
| 72  |            | CTG TGT GTA TTT GTG GCC TTC AGC TAG TCT <b>GGA TCA AGT GTG</b> GCC CAG AAG GTT ACT CAA |
| 7   |            | L C V F V A F S Y S G S S V A Q K V T Q                                                |
| 132 |            | GCC CAG TCA TCA GTA TCC ATG CCA GTG AGG AAA GCA GTC ACC CTG AAC TGC CTG TAT GAA        |
| 27  |            | A Q S S V S M P V R K A V T L N C L Y E                                                |
| 192 |            | ACA AGT TGG TGG GCA TAT TAT ATT TTT TGG TAG AAG CAA CTT CGC AGC AAA GAG ATG ATT        |
| 47  |            | T S W W A Y Y I F W Y K Q L P S K E M I                                                |
| 252 |            | TTC CTT ATT CGC CAG GGT TCT GAT GAA CAG AAT GCA AAA AGT GGT CGC TAT TCT GTC AAC        |
| 67  |            | F L I R Q G S D E Q N A K S G R Y S V N                                                |
| 312 |            | TTC AAG AAA GCA GCG AAA TCC GTC GCC TTA ACC ATT TCA GCC TTA CAG CTA GAA GAT TCA        |
| 87  |            | F K K A A K S V A L T I S A L Q L E D S                                                |
| 372 |            | GCA AAG TAC TTT TGT GCT CTT GGG GAA <b>CCC GGA GGG TTC CCT CGT ACT GGG GGG ATA GGG</b> |
| 107 |            | A K Y F C A L G E P G G F P R T G G I G                                                |
| 432 |            | <b>TGG ACC GAT AAA CTC ATC TTT GGA AAA GGA ACC CGT GTG ACT GTG GAA CCA</b> AGA AGT CAG |
| 127 |            | W T D K L I F G K G T R V T V E P R S Q                                                |
| 492 |            | CCT CAT ACC AAA CCA TCC GTT TTT GTC ATG AAA AAT GGA ACA AAT GTC GCT TGT CTG GTG        |
| 147 |            | P H T K P S V F V M K N G T N V A C L V                                                |
| 552 |            | AAG GAA TTC TAC CCC AAG GAT ATA AGA ATA AAT CTC GTG TCA TCC AAG AAG ATA ACA GAG        |
| 167 |            | K E F Y P K D I R I N L V S S K K I T E                                                |
| 612 |            | TTT GAT CCT GCT ATT GTC ATC TCT CCC AGT GGG AAG TAC AAT GCT GTC AAG CTT GGT AAA        |
| 187 |            | F D P A I V I S P S G K Y N A V K L G K                                                |
| 672 |            | TAT GAA GAT TCA AAT TCA GTG ACA TGT TCA GTT CAA CAC GAC AAT AAA ACT GTG CAC TCC        |
| 207 |            | Y E D S N S V T C S V Q H D N K T V H S                                                |
| 732 |            | ACT GAC TTT GAA GTG AAG ACA GAT TCT ACA GAT CAC GTA AAA CCA AAG GAA ACT GAA AAC        |
| 227 |            | T D F E V K T D S T D H V K P K E T E N                                                |
| 792 |            | ACA AAG CAA CCT TCA AAG AGC TGC CAT AAA CCC AAA GCC ATA GTT CAT ACC GAG AAG GTG        |
| 247 |            | T K Q P S K S C H K P K A I V H T E K V                                                |
| 852 |            | AAC ATG ATG TCC CTC ACA GTG CTT GGG CTA CGA ATG CTG TTT GCA AAG ACT GTT GCC GTC        |
| 267 |            | N M M S L T V L G L R M L F A K T V A V                                                |
| 912 |            | AAT TTT CTC TTG ACT GCC AAG TTA TTT TTC TTG TAA GGCTGACTGGCATGAGGAAGCTACACTC           |
| 287 |            | N F L L T A K L F F L .                                                                |
| 979 |            | <b>CCTCGAG</b>                                                                         |
|     |            | (Xho I)                                                                                |

## Supplementary Figure S1B.

Nucleotide and deduced amino acid sequences of δ1 TCR gene in δ1/pREP4 plasmid.

## γ2 TCR gene insert

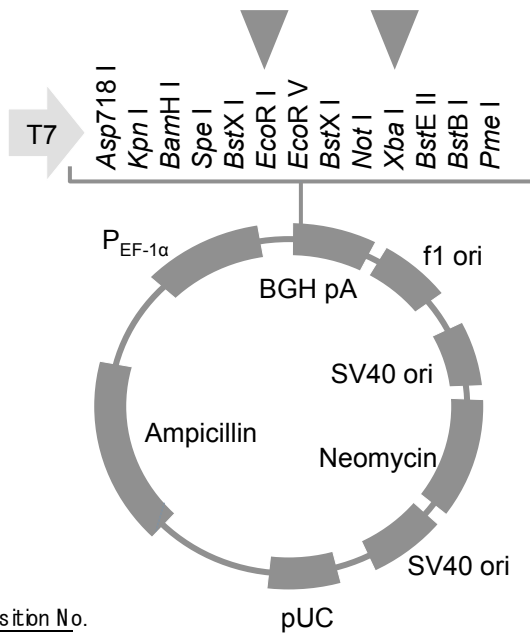

## pEF1/Myc-His A plasmid

The sequence for pEF1/Myc-His A (Thermo Fisher Scientific, Cat. No.: V921-20) is available for downloading from [www.invitrogen.com](http://www.invitrogen.com).

### Composition:

L - Vγ2 - N - Jγ1.2 - Cγ1

Boxed sequence: Restriction enzyme site

Gray area: Vγ2 region (TCR<sub>GV2S1</sub>)

Dash line: -N- region

Solid line: Jγ1.2 region (TCR<sub>GJ1S2</sub>)

Position No.

| P.  | N.  | (EcoR I)                                                                        |     |     |     |     |     |     |     |     |     |     |     |     |     |     |     |     |     |  |  |  |
|-----|-----|---------------------------------------------------------------------------------|-----|-----|-----|-----|-----|-----|-----|-----|-----|-----|-----|-----|-----|-----|-----|-----|-----|--|--|--|
| 1   | 1   | GAATTCGCC                                                                       | ATG | CTG | TCA | CTG | CTC | CAC | GCA | TCA | ACG | CTG | GCA | GTC | CTT | GGG | GCT | CTG | TGT |  |  |  |
|     |     |                                                                                 | M   | L   | S   | L   | L   | H   | A   | S   | T   | L   | A   | V   | L   | G   | A   | L   | C   |  |  |  |
| 61  | 18  | GTA TAT GGT GCA GGT CAC CTA GAG CAA CCT CAA ATT TCC AGT ACT AAA ACG CTG TCA AAA |     |     |     |     |     |     |     |     |     |     |     |     |     |     |     |     |     |  |  |  |
|     |     | V Y G A G H L E Q P Q I S S T K T L S K                                         |     |     |     |     |     |     |     |     |     |     |     |     |     |     |     |     |     |  |  |  |
| 121 | 38  | ACA GCC CGC CTG GAA TGT GTG GTG TCT GGA ATA ACA ATT TCT GCA ACA TCT GTA TAT TGG |     |     |     |     |     |     |     |     |     |     |     |     |     |     |     |     |     |  |  |  |
|     |     | T A R L E C V V S G I T I S A T S V Y W                                         |     |     |     |     |     |     |     |     |     |     |     |     |     |     |     |     |     |  |  |  |
| 181 | 58  | TAT CGA GAG AGA CCT GGT GAA GTC ATA CAG TTC CTG GTG TCC ATT TCA TAT GAC GGC ACT |     |     |     |     |     |     |     |     |     |     |     |     |     |     |     |     |     |  |  |  |
|     |     | Y R E R P G E V I Q F L V S I S Y D G T                                         |     |     |     |     |     |     |     |     |     |     |     |     |     |     |     |     |     |  |  |  |
| 241 | 78  | GTC AGA AAG GAA TCC GGC ATT CCG TCA GGC AAA TTT GAG GTG GAT AGG ATA CCT GAA ACG |     |     |     |     |     |     |     |     |     |     |     |     |     |     |     |     |     |  |  |  |
|     |     | V R K E S G I P S G K F E V D R I P E T                                         |     |     |     |     |     |     |     |     |     |     |     |     |     |     |     |     |     |  |  |  |
| 301 | 98  | TCT ACA TCC ACT CTC ACC ATT CAC AAT GTA GAG AAA CAG GAC ATA GCT ACC TAC TAC TGT |     |     |     |     |     |     |     |     |     |     |     |     |     |     |     |     |     |  |  |  |
|     |     | S T S T L T I H N V E K Q D I A T Y Y C                                         |     |     |     |     |     |     |     |     |     |     |     |     |     |     |     |     |     |  |  |  |
| 361 | 118 | GCC TTG TGG GAG GAT CAA GAG TTG GGC AAA AAA ATC AAG GTA TTT GGT CCC GGA ACA AAG |     |     |     |     |     |     |     |     |     |     |     |     |     |     |     |     |     |  |  |  |
|     |     | A L W E D Q E L G K K I K V F G P G T K                                         |     |     |     |     |     |     |     |     |     |     |     |     |     |     |     |     |     |  |  |  |
| 421 | 138 | CTT ATC ATT ACA GAT AAA CAA CTT GAT GCA GAT GTT TCC CCC AAG CCC ACT ATT TTT CTT |     |     |     |     |     |     |     |     |     |     |     |     |     |     |     |     |     |  |  |  |
|     |     | L I I T D K Q L D A D V S P K P T I F L                                         |     |     |     |     |     |     |     |     |     |     |     |     |     |     |     |     |     |  |  |  |
| 481 | 158 | CCT TCA ATT GCT GAA ACA AAG CTC CAG AAG GCT GGA ACA TAC CTT TGT CTT CTT GAG AAA |     |     |     |     |     |     |     |     |     |     |     |     |     |     |     |     |     |  |  |  |
|     |     | P S I A E T K L Q K A G T Y L C L L E K                                         |     |     |     |     |     |     |     |     |     |     |     |     |     |     |     |     |     |  |  |  |
| 541 | 178 | TTT TTC CCT GAT GTT ATT AAG ATA CAT TGG GAA GAA AAG AAG AGC AAC ACG ATT CTG GGA |     |     |     |     |     |     |     |     |     |     |     |     |     |     |     |     |     |  |  |  |
|     |     | F F P D V I K I H W E E K K S N T I L G                                         |     |     |     |     |     |     |     |     |     |     |     |     |     |     |     |     |     |  |  |  |
| 601 | 198 | TCC CAG GAG GGG AAC ACC ATG AAG ACT AAT GAC ACA TAC ATG AAA TTT AGC TGG TTA ACG |     |     |     |     |     |     |     |     |     |     |     |     |     |     |     |     |     |  |  |  |
|     |     | S Q E G N T M K T N D T Y M K F S W L T                                         |     |     |     |     |     |     |     |     |     |     |     |     |     |     |     |     |     |  |  |  |
| 661 | 218 | GTG CCA GAA AAG TCA CTG GAC AAA GAA CAC AGA TGT ATC GTC AGA CAT GAG AAT AAT AAA |     |     |     |     |     |     |     |     |     |     |     |     |     |     |     |     |     |  |  |  |
|     |     | V P E K S L D K E H R C I V R H E N N K                                         |     |     |     |     |     |     |     |     |     |     |     |     |     |     |     |     |     |  |  |  |
| 721 | 238 | AAC GGA GTT GAT CAA GAA ATT ATC TTT CCT CCA ATA AAG ACA GAT GTC ATC ACA ATG GAT |     |     |     |     |     |     |     |     |     |     |     |     |     |     |     |     |     |  |  |  |
|     |     | N G V D Q E I I F P P I K T D V I T M D                                         |     |     |     |     |     |     |     |     |     |     |     |     |     |     |     |     |     |  |  |  |
| 781 | 258 | CCC AAA GAC AAT TGT TCA AAA GAT GCA AAT GAT ACA CTA CTG CTG CAG CTC ACA AAC ACC |     |     |     |     |     |     |     |     |     |     |     |     |     |     |     |     |     |  |  |  |
|     |     | P K D N C S K D A N D T L L L Q L T N T                                         |     |     |     |     |     |     |     |     |     |     |     |     |     |     |     |     |     |  |  |  |
| 841 | 278 | TCT GCA TAT TAC ACG TAC CTC CTC CTG CTC CTC AAG AGT GTG GTC TAT TTT GCC ATC ATC |     |     |     |     |     |     |     |     |     |     |     |     |     |     |     |     |     |  |  |  |
|     |     | S A Y Y T Y L L L L L K S V V Y F A I I                                         |     |     |     |     |     |     |     |     |     |     |     |     |     |     |     |     |     |  |  |  |
| 901 | 298 | ACC TGC TGT CTG CTT AGA AGA ACG GCT TTC TGC TGC AAT GGA GAG AAA TCA TAA TCTAGA  |     |     |     |     |     |     |     |     |     |     |     |     |     |     |     |     |     |  |  |  |
|     |     | T C C L L R R T A F C C N G E K S . (Xba I)                                     |     |     |     |     |     |     |     |     |     |     |     |     |     |     |     |     |     |  |  |  |

## Supplementary Figure S1C.

Nucleotide and deduced amino acid sequences of γ2 TCR gene in γ2/pEF1 plasmid.

## δ2 TCR gene insert

## pREP4 plasmid

The sequence for pREP4 (Thermo Fisher Scientific, Cat. No.: V004-50) is available for downloading from [www.invitrogen.com](http://www.invitrogen.com).

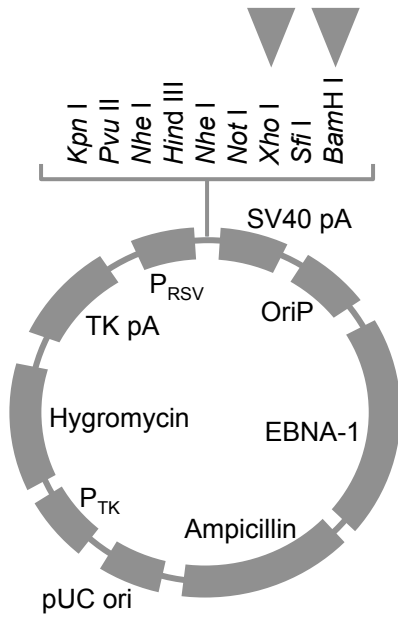

### Composition:

L - Vδ2 - NDN - Jδ1 - Cδ1

Boxed sequence: Restriction enzyme site  
Gray area: Vδ2 region (TCRDV102S1)

Dash line: -NDN- region

Solid line: Jδ1 region (TCRDJ1S1)

Position No.

| P.   | N.                                                                              | (Xho I)                                                                 |
|------|---------------------------------------------------------------------------------|-------------------------------------------------------------------------|
| 1    | CTCGAG                                                                          | AACACTTGTGTGTTGGTTTCAGAGGAGGGACCAGGCAGAAAGGTGGTTGAGAGGCAGAGCTGCCCTGAGT  |
| 76   | GAGCC                                                                           | ATG CAG AGG ATC TCC TCC CTC ATC CAT CTC TCT CTC TTC TGG GCA GGA GTC ATG |
| 1    |                                                                                 | M Q R I S S L I H L S L F W A G V M                                     |
| 135  | TCA GCC ATT GAG TTG GTG CCT GAA CAC CAA ACA GTG CCT GTG TCA ATA GGG GTC CCT GCC |                                                                         |
| 19   | S A I E L V P E H Q T V P V S I G V P A                                         |                                                                         |
| 195  | ACC CTC AGG TGC TCC ATG AAA GGA GAA GCG ATC GGT AAC TAC TAT ATC AAC TGG TAC AGG |                                                                         |
| 39   | T L R C S M K G E A I G N Y Y I N W Y R                                         |                                                                         |
| 255  | AAG ACC CAA GGT AAC ACA ATC ACT TTC ATA TAC CGA GAA AAG GAC ATC TAT GGC CCT GGT |                                                                         |
| 59   | K T Q G N T I T F I Y R E K D I Y G P G                                         |                                                                         |
| 315  | TTC AAA GAC AAT TTC CAA GGT GAC ATT GAT ATT GCA AAG AAC CTG GCT GTA CTT AAG ATA |                                                                         |
| 79   | F K D N F Q G D I D I A K N L A V L K I                                         |                                                                         |
| 375  | CTT GCA CCA TCA GAG AGA GAT GAA GGG TCT TAC TAC TGT GCC TGT GAC ACC CTG GTT GCT |                                                                         |
| 99   | L A P S E R D E G S Y Y C A C D T L V A                                         |                                                                         |
| 435  | GGG GGT TTG TAC ACC GAT AAA CTC ATC TTT GGA AAA GGA ACC CGT GTG ACT GTG GAA CCA |                                                                         |
| 119  | G G L Y T D K L I F G K G T R V T V E P                                         |                                                                         |
| 495  | AGA AGT CAG CCT CAT ACC AAA CCA TCC GTT TTT GTC ATG AAA AAT GGA ACA AAT GTC GCT |                                                                         |
| 139  | R S Q P H T K P S V F V M K N G T N V A                                         |                                                                         |
| 555  | TGT CTG GTG AAG GAA TTC TAC CCC AAG GAT ATA AGA ATA AAT CTC GTG TCA TCC AAG AAG |                                                                         |
| 159  | C L V K E F Y P K D I R I N L V S S K K                                         |                                                                         |
| 615  | ATA ACA GAG TTT GAT CCT GCT ATT GTC ATC TCT CCC AGT GGG AAG TAC AAT GCT GTC AAG |                                                                         |
| 179  | I T E F D P A I V I S P S G K Y N A V K                                         |                                                                         |
| 675  | CTT GGT AAA TAT GAA GAT TCA AAT TCA GTG ACA TGT TCA GTT CAA CAC GAC AAT AAA ACT |                                                                         |
| 199  | L G K Y E D S N S V T C S V Q H D N K T                                         |                                                                         |
| 735  | GTG CAC TCC ACT GAC TTT GAA GTG AAG ACA GAT TCT ACA GAT CAC GTA AAA CCA AAG GAA |                                                                         |
| 219  | V H S T D F E V K T D S T D H V K P K E                                         |                                                                         |
| 795  | ACT GAA AAC ACA AAG CAA CCT TCA AAG AGC TGC CAT AAA CCC AAA GCC ATA GTT CAT ACC |                                                                         |
| 239  | T E N T K Q P S K S C H K P K A I V H T                                         |                                                                         |
| 855  | GAG AAG GTG AAC ATG ATG TCC CTC ACA GTG CTT GGG CTA CGA ATG CTG TTT GCA AAG ACT |                                                                         |
| 259  | E K V N M M S L T V L G L R M L F A K T                                         |                                                                         |
| 915  | GTT GCC GTC AAT TTT CTC TTG ACT GCC AAG TTA TTT TTC TTG TAA GGCTGACTGGCATGAGGA  |                                                                         |
| 279  | V A V N F L L T A K L F F L                                                     |                                                                         |
| 978  | AGCTACACTCCTGAAGAAACCAAAGGCTTACAAAAATGCATCTCCTTGGCTTCTGACTTCTTTGTGATTCAAGTTG    |                                                                         |
| 1054 | ACCTGTCATAGCCTTGTAAATGGCTGCTAGCCAAACCCTTTTTCTTCAAAGACAACAAACCCAGCTCATCCTC       |                                                                         |
| 1130 | CAGCTTGATGGGAAGACAAAAGTCTGGGGAAGGGGGTTTATGTCTTAAGCTGTTTGTATGCTGTTTTATAAAGG      |                                                                         |
| 1206 | GATAGAAGGATATAAAAAGATATAGGACTCTTTTTTACTCCTACAAGTGATACCC                         |                                                                         |
|      | TGGATCC                                                                         | (BamH I)                                                                |

### Supplementary Figure S1D.

Nucleotide and deduced amino acid sequences of δ2 TCR gene in δ2/pREP4 plasmid.

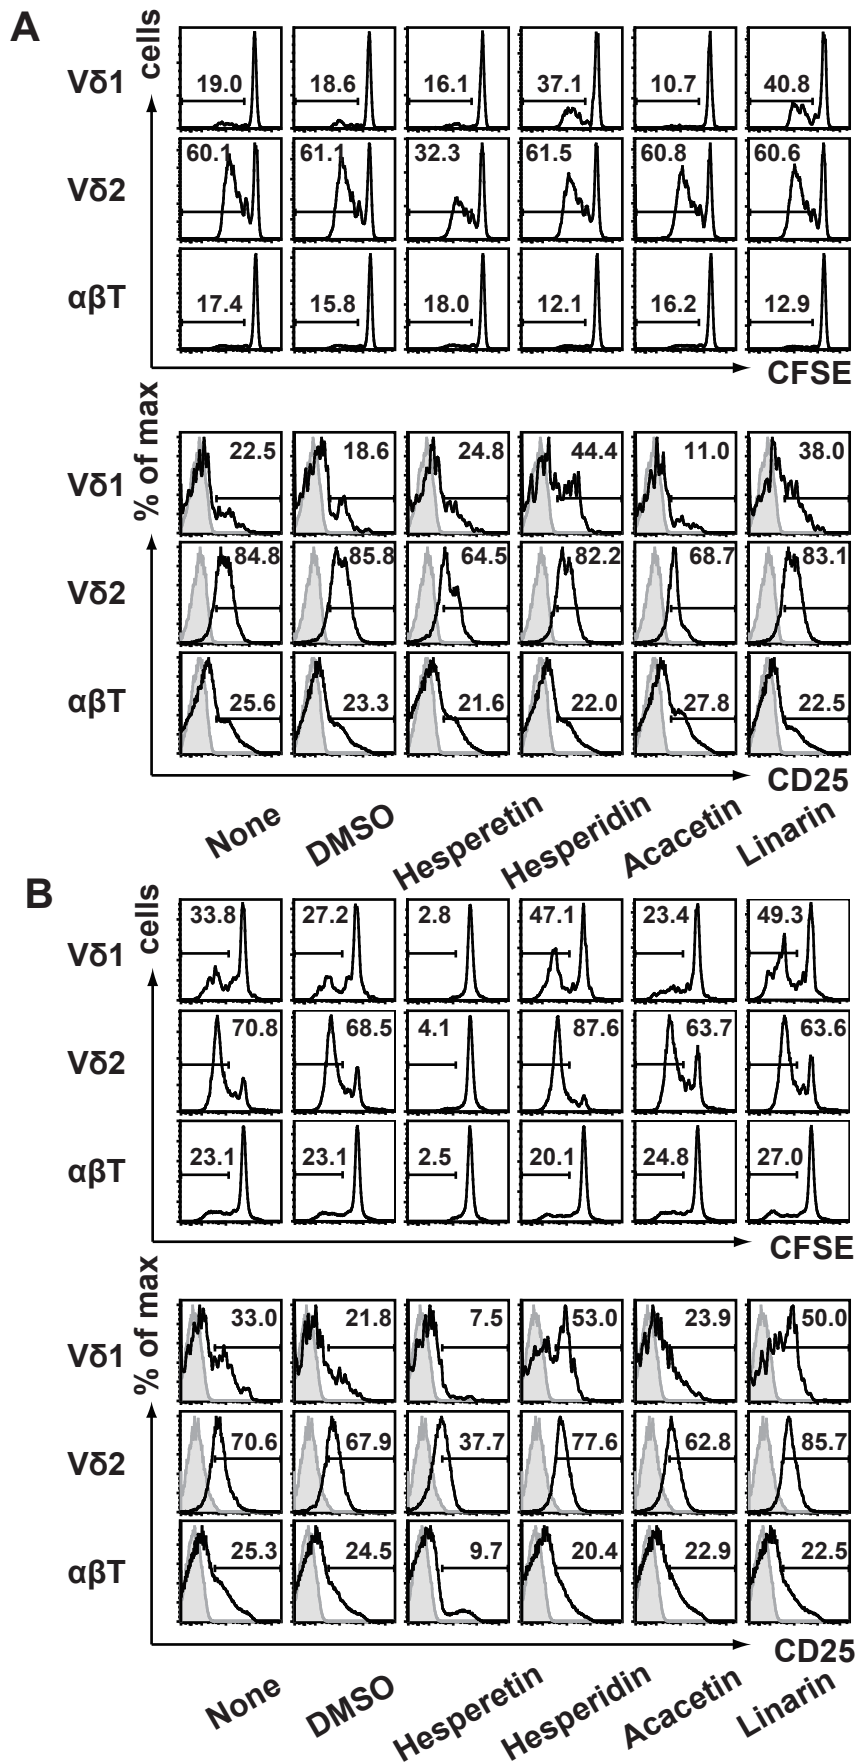

Supplementary Figure S2. Effects of hesperidin and ilinarin on the proliferation and activation of human PBMC-derived Vδ1+ T cells. The data shown as (A) and (B) are technical replicates of a single donor.
